# Supplementary material for: Identification, cloning and characterization of the tomato TCP transcription factor family
Source: PubMed Central journal article supplement (PMC4070083; doi:10.1186/1471-2229-14-157), 2014-06-06

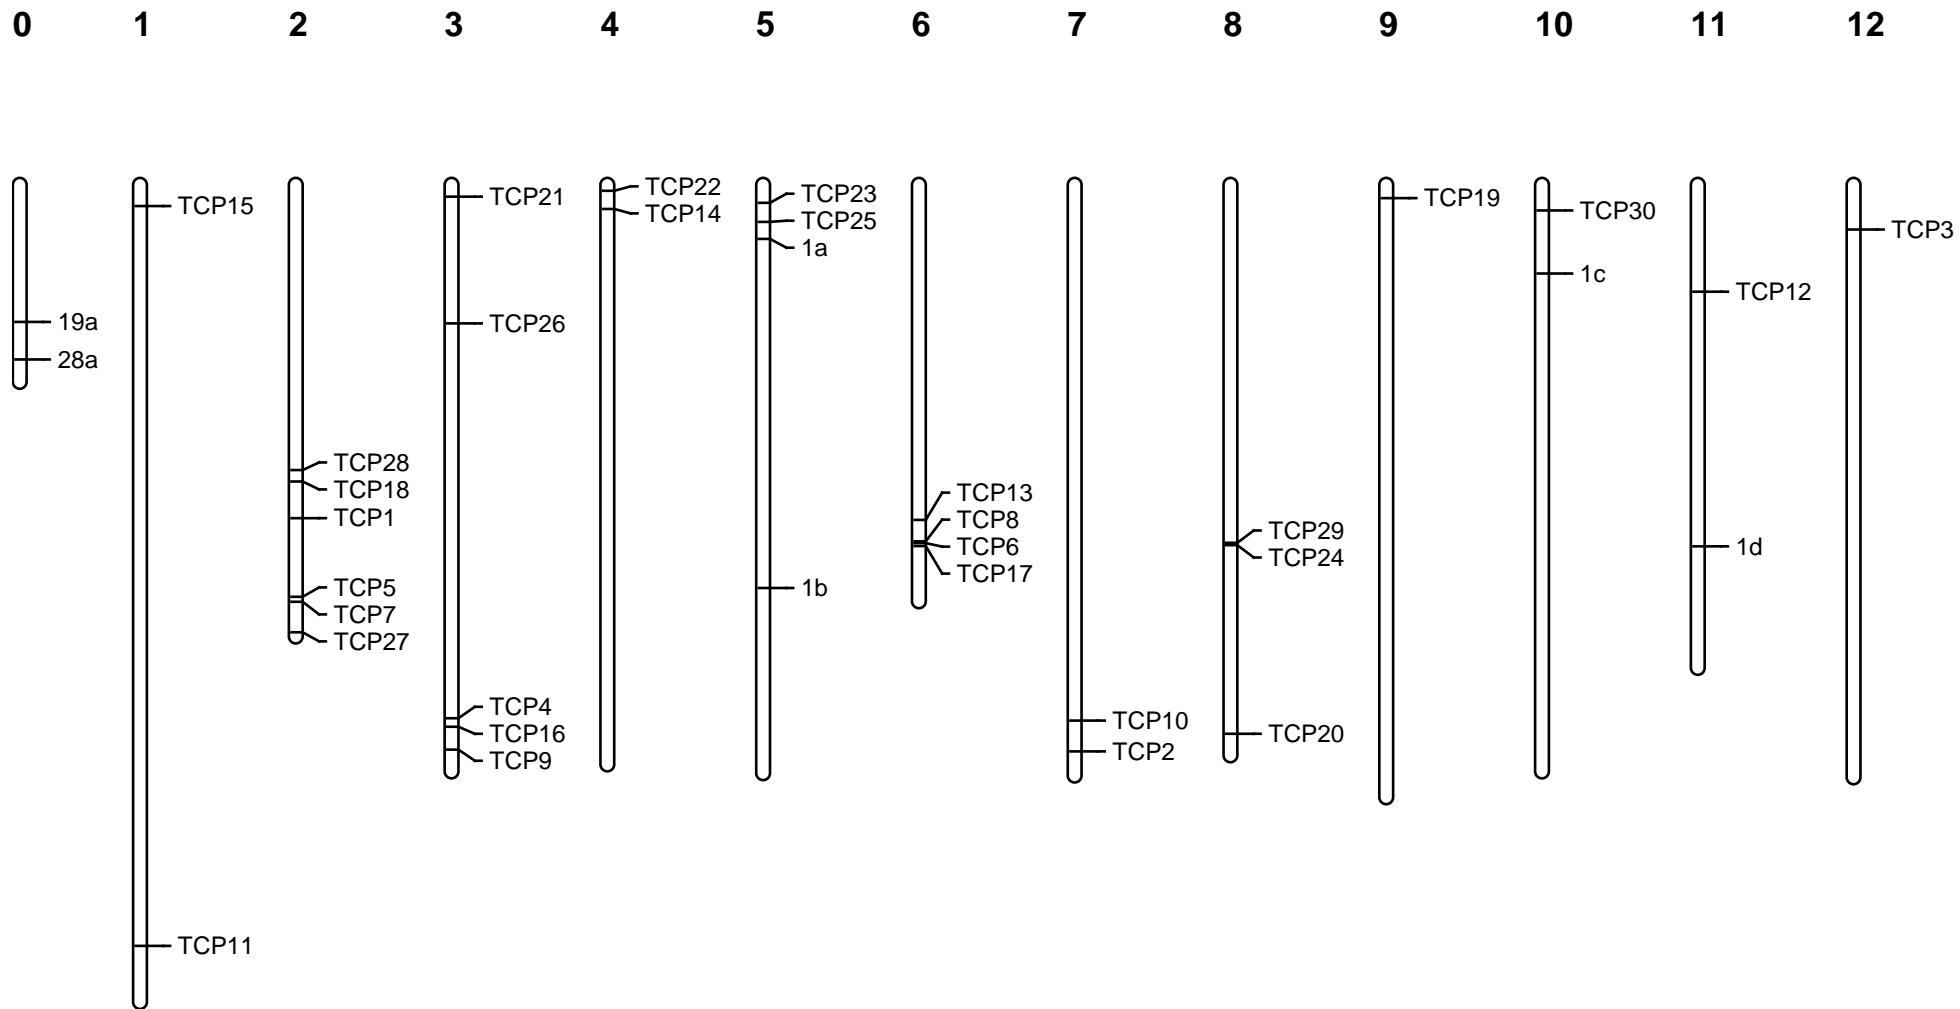

Supplement: 1471-2229-14-157-S1.pdf [file 1471-2229-14-157-S1.pdf]
