# Supplementary material for: Identification, cloning and characterization of the tomato TCP transcription factor family
Source: PubMed Central journal article supplement (PMC4070083; doi:10.1186/1471-2229-14-157), 2014-06-06
Supplement: 1471-2229-14-157-S2.pdf [file 1471-2229-14-157-S2.pdf]

**Additional Table 1. Additional (partial) copies of *SITCP1*, -19, and -28 found in the tomato reference genome**

| <b>Name<sup>a</sup></b> | <b>Gene (ITAG2.4)</b> | <b>SGN Unigene</b> |
|-------------------------|-----------------------|--------------------|
| <i>SITCP1-like a</i>    | Solyc05g012840.1      | None               |
| <i>SITCP1-like b</i>    | Solyc05g032780.1      | None               |
| <i>SITCP1-like c</i>    | Solyc10g018710.1      | None               |
| <i>SITCP1-like d</i>    | Solyc11g045640.1      | None               |
| <i>SITCP19-like a</i>   | Solyc00g084870.2      | None               |
| <i>SITCP28-like a</i>   | Solyc00g217560.1      | None               |

**Additional Table 2.** Scoring tables for the yeast two-hybrid experiments. Every experiment was performed in triplicate and interactions were scored as positive if growth occurred on both selection media in at least two of the three experiments.

*File can be found under name and format: "Additional Table 2.xlsx"*

**Additional table 3.** Yeast one-hybrid results, representing the binding of the Arabidopsis transcription factor proteins and the cloned corresponding tomato homologous proteins to the tomato TCP12, -15, and -18 promoter elements independently. "-" represents no binding, "+" represents binding

*File can be found under name and format: "Additional Table 3.xlsx"*

**Additional table 4.** Tomato TCP genes, corresponding SGN-Unigenes, (re)sequenced EST clones, and RACE experiments performed to obtain full-length cDNAs

| Name           | Gene (ITAG2.4)   | SGN Unigene              | Sequenced EST clones <sup>a</sup>      | RACE <sup>b</sup> |
|----------------|------------------|--------------------------|----------------------------------------|-------------------|
| <i>SITCP1</i>  | Solyc02g077250.2 | none                     |                                        | 5', 3'            |
| <i>SITCP2</i>  | Solyc07g062680.1 | SGN-U594432, SGN-U566833 | cTOC19N10, cLEB3N9                     | -                 |
| <i>SITCP3</i>  | Solyc12g014140.1 | SGN-U594431, SGN-U566832 | TUS60P6, cLET3M23, cLEL35O17, cTOF34G9 | -                 |
| <i>SITCP4</i>  | Solyc03g115010.1 | SGN-U582556, SGN-U603841 |                                        | 5', 3'            |
| <i>SITCP5</i>  | Solyc02g089020.1 | SGN-U585799, SGN-U585800 | cLET3H17, cTOC20G10, cTOC22M17         | 5'                |
| <i>SITCP6</i>  | Solyc06g069460.1 | SGN-U601349              | cTOA29H21                              | -                 |
| <i>SITCP7</i>  | Solyc02g089830.1 | None                     |                                        | 5', 3'            |
| <i>SITCP8</i>  | Solyc06g069240.1 | None                     |                                        | 5', 3'            |
| <i>SITCP9</i>  | Solyc03g119770.2 | SGN-U584141              | cTOS6K18                               | 5', 3'            |
| <i>SITCP10</i> | Solyc07g053410.2 | SGN-U597981              | cTOF6D9                                | 5'                |
| <i>SITCP11</i> | Solyc01g103780.2 | SGN-U577117              | TUS37P1, cTOF17M2, cTOC22M8            | 5'                |
| <i>SITCP12</i> | Solyc11g020670.1 | SGN-U573569              | TUS24K10                               | 5'                |
| <i>SITCP13</i> | Solyc06g065190.1 | SGN-U562794              | cTOC4H22, cLEI13H13                    | -                 |
| <i>SITCP14</i> | Solyc04g009180.1 | SGN-U579351, SGN-U563595 | TUS61K24, TUS69A20                     | -                 |
| <i>SITCP15</i> | Solyc01g008230.2 | SGN-U581159              | cTOF6B9, cTOC12D24, cTOC24I7           | 5'                |
| <i>SITCP16</i> | Solyc03g116320.2 | SGN-U574962, SGN-U571327 | cTOF23G15, cTOF31L2                    | -                 |
| <i>SITCP17</i> | Solyc06g070900.2 | SGN-U586610              | cLEI9N14                               | -                 |
| <i>SITCP18</i> | Solyc02g068200.1 | SGN-U576961              | cTOC20P22                              | -                 |
| <i>SITCP19</i> | Solyc09g008030.1 | SGN-U567380              | TUS60E22, cLES12D23                    | 3'                |
| <i>SITCP20</i> | Solyc08g080150.1 | SGN-U566570              | cLED17B2, TUS22B5                      | 5', 3'            |
| <i>SITCP21</i> | Solyc03g006800.1 | SGN-U603785              | cTOC1O20                               | 5', 3'            |
| <i>SITCP22</i> | Solyc04g006980.1 | SGN-U583072, SGN-U602382 | TUS69G5                                | -                 |
| <i>SITCP23</i> | Solyc05g007420.1 | SGN-U603706              |                                        | 5', 3'            |
| <i>SITCP24</i> | Solyc08g048390.1 | SGN-U573225              | cTOF3D1                                | 3'                |
| <i>SITCP25</i> | Solyc05g009900.1 | None                     | from gene model                        |                   |
| <i>SITCP26</i> | Solyc03g045030.1 | None                     | from gene model                        |                   |
| <i>SITCP27</i> | Solyc02g094290.1 | SGN-U599631              | from gene model                        |                   |
| <i>SITCP28</i> | Solyc02g065800.1 | None                     | from gene model                        |                   |
| <i>SITCP29</i> | Solyc08g048370.2 | None                     | from gene model                        |                   |
| <i>SITCP30</i> | Solyc10g008780.1 | SGN-U603276              | from gene model                        |                   |

<sup>a</sup>EST clones (re)sequenced for finding clones containing a full open reading frame

<sup>b</sup>RACE experiments performed for de novo sequencing of transcripts and for obtaining templates for the amplification of the open reading frame

**Additional table 5.** Sequences of primers used for amplification of open reading frames

| <b>Name</b>    | <b>Forward primer</b>                 | <b>Reverse primer</b>           |
|----------------|---------------------------------------|---------------------------------|
| <i>SITCP01</i> | CACCCAGCAGATGCCACAGTCACTCTGC          | GGGTCTCAAGTTATTTGCTTAATGGATC    |
| <i>SITCP02</i> | CACCATGGCAGAAACGTCAAGATTGGGTATA       | AACTTTTTGGAGCTAATTCAATGGCG      |
| <i>SITCP03</i> | CACCGATCATTTTATGTATGAAGATTTAGATACCATC | TTCAATGACGAGAATCAGAGGAAGC       |
| <i>SITCP04</i> | CACCATGAAATTCATCGAGTGAAATAATTTTG      | GGCTTAGAATCAAATTGCGCGACC        |
| <i>SITCP05</i> | CACCATGATTACAAGAGAAGAGAAGGGGAAC       | GATCTTAATTGGAAGGCTCCGTGTCATCAC  |
| <i>SITCP06</i> | CACCATGAACTCAAGAAAGCAAGAACTG          | ATATGCTTAAGAACCACTGCCTTC        |
| <i>SITCP07</i> | CACCATGTTCCCTTTTGAAACAGTAGTAATGGTGG   | GCTAGCTTACGCTGTTCCCTTCAGA       |
| <i>SITCP08</i> | CACCATGTATCCTCCAAGCAACAATAACTGCAGC    | CCTTGCCCTAGCCTTCCCATAGC         |
| <i>SITCP09</i> | CACCATGTACCCTTCGAGCAATTACAGCCC        | TTAGCCTTGAATACCTGATTGATGATC     |
| <i>SITCP10</i> | CACCATGAAGAGCGCAACTGGAGGA             | AATGATGAGCATTAGGAGAAGCAGAG      |
| <i>SITCP11</i> | CACCCCAAATTATGGAACACTGATTTAC          | CTTTCAAGCACTTTCCTCCATCACACTAGAG |
| <i>SITCP12</i> | CACCAAAATGGAATTCATGGAACCACATAC        | CATCGAGATTTGTAACTATGATTG        |
| <i>SITCP13</i> | CACCGCCATGGAATTTAGAGAGTCAAATAG        | GTTGGAGTTATGATTGGGAATCTTTGTG    |
| <i>SITCP14</i> | CACCATGTCGACGTCTGCAGAGGGAAA           | TCAACGTCCGTCGTCGTCTCTT          |
| <i>SITCP15</i> | CACCATGTCGACGTGCGTAGAGCAAAAC          | CTTCATTGTCCATCGTCGTC            |
| <i>SITCP16</i> | CACCGTGAACATGGATGGAGGAGGTGATG         | GCTATGAATGATGGCTCGTTGTATCG      |
| <i>SITCP17</i> | CACCATGGAAGGAGGAGGAGGTGACG            | TTAGGAATTATGATGGCTTGTGAATC      |
| <i>SITCP18</i> | CACCATGGATCCCAAACAGG                  | ACCAAATGAAAAATCATTACC           |
| <i>SITCP19</i> | CACCATGGGTTTCAGAAATAGTTGTTCCGGT       | CTCTACTGTTTCTCATCTTCTTCGGCG     |
| <i>SITCP20</i> | CACCATGTCCAGTTTTTCATGACCCAGATG        | CTATGAACGTTCTGAAGATGTAACCTTGAG  |
| <i>SITCP21</i> | CACCAAAATGGCGAGGGTTGAGAACA            | TCAGGATTTAGATGAGGAAGTTTG        |
| <i>SITCP22</i> | CACCCTAAACATGTTTCCTTCAAGCAATA         | CGACTTGAACTTATTCCAATCTATGATGT   |
| <i>SITCP23</i> | CACCATGAAAACCTGGCCATCATCATCATG        | TCAAGAATGATGTTGATGATCATCTCC     |
| <i>SITCP24</i> | CACCAGTATGGAGATGGAGGAGATTCCG          | GCCATGGAAGTTTAGTTCTTTC          |

**Additional table 6.** Sequences of primers used for quantitative RT-PCR

| <b>Name</b>    | <b>Forward primer</b>    | <b>Reverse primer</b>    |
|----------------|--------------------------|--------------------------|
| <i>SITCP01</i> | AGCAAGAGGTGAATTATGACATCC | CTGAAGTGGTGGTGAAGAAGC    |
| <i>SITCP02</i> | CTCTGATTCTCGCCATTGAA     | TCTCCATCTCCAGGCTCTTT     |
| <i>SITCP03</i> | CAATTGCTGGAGCACGTAGT     | GCACGAATCGAAGGTGAGT      |
| <i>SITCP04</i> | CGATACTTCTCCTCCACTTC     | AGCGATTGACTTGTTCTC       |
| <i>SITCP05</i> | CGGAGCCTTCCAATTAAGAT     | ATGAAACATCCGATCAACCA     |
| <i>SITCP06</i> | TCAACAGCAACAACAACAACA    | CCCTGAACCAGTTTCTTGCT     |
| <i>SITCP07</i> | ATCGGAGGGTGAGGTTGTC      | AACCAAGCATGTCTTGCAAAT    |
| <i>SITCP08</i> | TGGTGCAATTTGTGCATCTA     | ATCTTGAGCGGTTTCCTTGT     |
| <i>SITCP09</i> | GAATTCGGGTTTCATATTGCAT   | AAAGATGTACCCTTCGAGCAA    |
| <i>SITCP10</i> | CGCCACCAACACAATCAC       | ATAGCAAGAGAAGTAGGTATAAGC |
| <i>SITCP11</i> | GCCACTAGATCGGACACCTT     | GCTGCACAGGTTGTGTTTGT     |
| <i>SITCP12</i> | GACCACCAATTGTGGCAGTA     | AAACTCCAACCCACCAATTC     |
| <i>SITCP13</i> | GGCAAGACCCAGATGAGAAT     | CCTTGAACTCCGGTCTTTC      |
| <i>SITCP14</i> | GGAATTACTTACCAATGACTC    | ACAACAATAACGATAACAATAAC  |
| <i>SITCP15</i> | GGCGTAGGAGGAGGAGGAGAG    | TCGTGGCAGAGGCATAACC      |
| <i>SITCP16</i> | ATCCGATGGCGAAACAATAG     | GTTCTGTAGCGGCGATTAC      |
| <i>SITCP17</i> | AAGACCGCCACACTAAGGTT     | ATCGGATTTGTGACCGAGTT     |
| <i>SITCP18</i> | AATCCTCATCTGCTCCATCA     | GTAGCTGCAGGCAGATCAAA     |
| <i>SITCP19</i> | CCTACCGGAAATCCAGAAAC     | CGCTGCTACAGGAACAGGTA     |
| <i>SITCP20</i> | AACCGTTTGATTCCGATCAT     | CTACCGGCATAGGCATTGAT     |
| <i>SITCP21</i> | ACATTGAACAAGAAGATGACGAG  | CCTTTAACAACAGCACCCCTATC  |
| <i>SITCP22</i> | AACCTAAGTAAGCCATCATCAC   | GCTCAAGGGAGACTCATTATG    |
| <i>SITCP23</i> | AACCAACAACAACAAAGGATAGAC | ACCAGTAGCAGCAATAACAGC    |
| <i>SITCP24</i> | TAGACGTGTTGCGCTTTCTG     | AGAGGTGGAAGCTCAGCAAT     |
| <i>SITCP25</i> | GGGATCATGGAAAGGTACTTAGG  | CAAGAATCCCCATATTGAAGC    |
| <i>SITCP26</i> | ACACTCCGAATTAGCCCTTG     | CTGAAATTTTCGGGCGATG      |
| <i>SITCP27</i> | GCTATTACAGAAAGCGGAACC    | GTAAAGCGATGCCTGAATTG     |
| <i>SITCP28</i> | CATCATCGTCATCATGGACA     | GCTCGTGACACACGAACAAT     |
| <i>SITCP29</i> | ACCGAAATATGCACCCTAGC     | CTCGGTGTGTTTTGGTCATC     |
| <i>SITCP30</i> | GCACAGCAAGGTTTCAACAG     | CTGAATTGCCGTGTTAGGAG     |

**Additional table 7.** Primers used for amplification of TCP12, TCP15 and TCP18 promoters

| <b>Name</b>    | <b>Forward primer</b>      | <b>Reverse primer</b>     |
|----------------|----------------------------|---------------------------|
| <i>SITCP12</i> | CCTACACCACCATAATCGCTTC     | AGTGAATTTAGAAGGAGCTGTCC   |
| <i>SITCP18</i> | TCAGGACTCTATTTAAAATCAAATGC | TCAGTAGCAATAGTGTGGCTAAACC |
| <i>SITCP15</i> | CACCATCGAAATGACAAATACTC    | GATTTTTATGGAAAAATAACACCAA |

**Additional table 8.** Primers used for the amplification of the ORF of tomato candidate genes

| <b>SGN-Unigene</b> | <b>Name</b>               | <b>Forward primer</b>           | <b>Reverse primer</b>       |
|--------------------|---------------------------|---------------------------------|-----------------------------|
| SGN-U571928        | <i>LeT12</i>              | ATGGAGTTTCAGGACCACTT            | TTACTGCTTGATTTACCTG         |
| SGN-U580795        | <i>ARF 3</i>              | ATGATGTGTGGACTTATTGATCTGA       | CTACAGAGCAATATCAAGAAGCACA   |
| SGN-U566000        |                           | ATGGGTAGAGGAAAAATTGACATAA       | TCACTTTGAGCCAACCTTGATTCTC   |
| SGN-U578103        | <i>JOINTLESS</i>          | ATGAAACAAATTCTTGAGAGGC          | TCAGCCTGAGTAAGGTAGCC        |
| SGN-U575250        |                           | ATGGTTTCACCGGAGAGTA             | TTAAGCAACTGGAGGACGG         |
| SGN-U585288        |                           | ATGAAGATGTTTGAGTTATCTGATTC      | TTAGCAGCAGCAGAGCTCTTG       |
| SGN-U563109        |                           | ATGGATTGGGAAAAACAGCA            | TTAGCCGGTCATGTTGTAGTC       |
| SGN-U573409        |                           | ATGGAAGGAAGTATTAGTAGCATAGATCA   | TACAAAGCATCAATAATAACCCTTTG  |
| SGN-U562646        |                           | ATGGAAGGAGAGAAGAGAAAACA         | TCAGTTATCTTCGTCGCAACTT      |
| SGN-U602159        | <i>LATERAL SUPPRESSOR</i> | ATGTTAGGATCCTTTGGTTCTTCA        | TCAACGCCAAGACGAGATG         |
| SGN-U579452        |                           | ATGTCTTCAACGGTGATTC             | TCAAATAGGAGGAGGTCCA         |
| SGN-U563553        |                           | ATGACTATAGGGGATCAAAGCG          | CTACAAACATAATCGGGTTCGTT     |
| SGN-U583072        | <i>SITCP22</i>            | ATGTTTCCTTCAAGCAATAACCA         | TTATTCCAATCTATGATGTTTGGAGGA |
| SGN-U591168        | <i>AP2a</i>               | CACCATGTGGAATTTAAATGATTC        | AGGTCTCATAAAATAATGATGGA     |
| SGN-U578471        | <i>RIN</i>                | CACCATGGGTAGAGGGAAAGTAGAATTGAAG | TCAATGCCATGATGTTTAAAAGG     |
| SGN-U576709        | <i>CNR</i>                | CACCATGGAACTAACAAATGGGAAG       | GCCCAAATTTTCTCCATGAGAG      |
